# Supplementary material for: Salivary Protein Panel to Diagnose Systolic Heart Failure
Source: PubMed Central journal article supplement (PMC6995570; doi:10.3390/biom9120766), 2019-11-22
Supplement: biomolecules-09-00766-s001.pdf [file biomolecules-09-00766-s001.pdf]

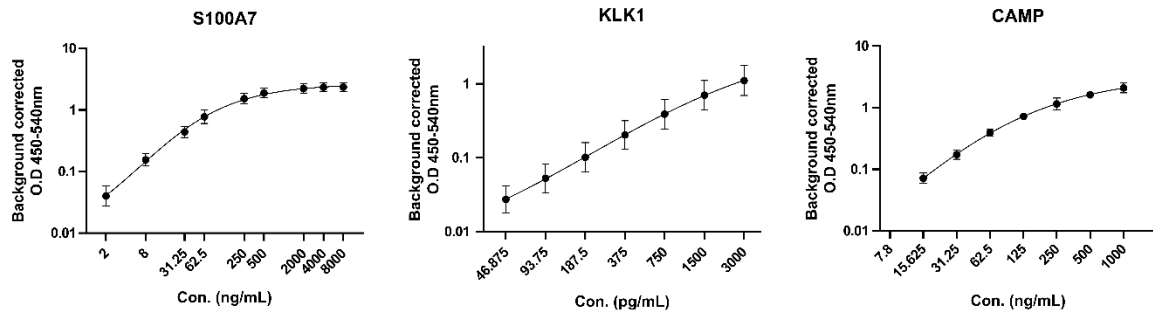

Figure S1: Typical standard curves of S100A7, KLK1 and CAMP ELISAs. The standard curves of each assay was averaged using 6 independent assays.

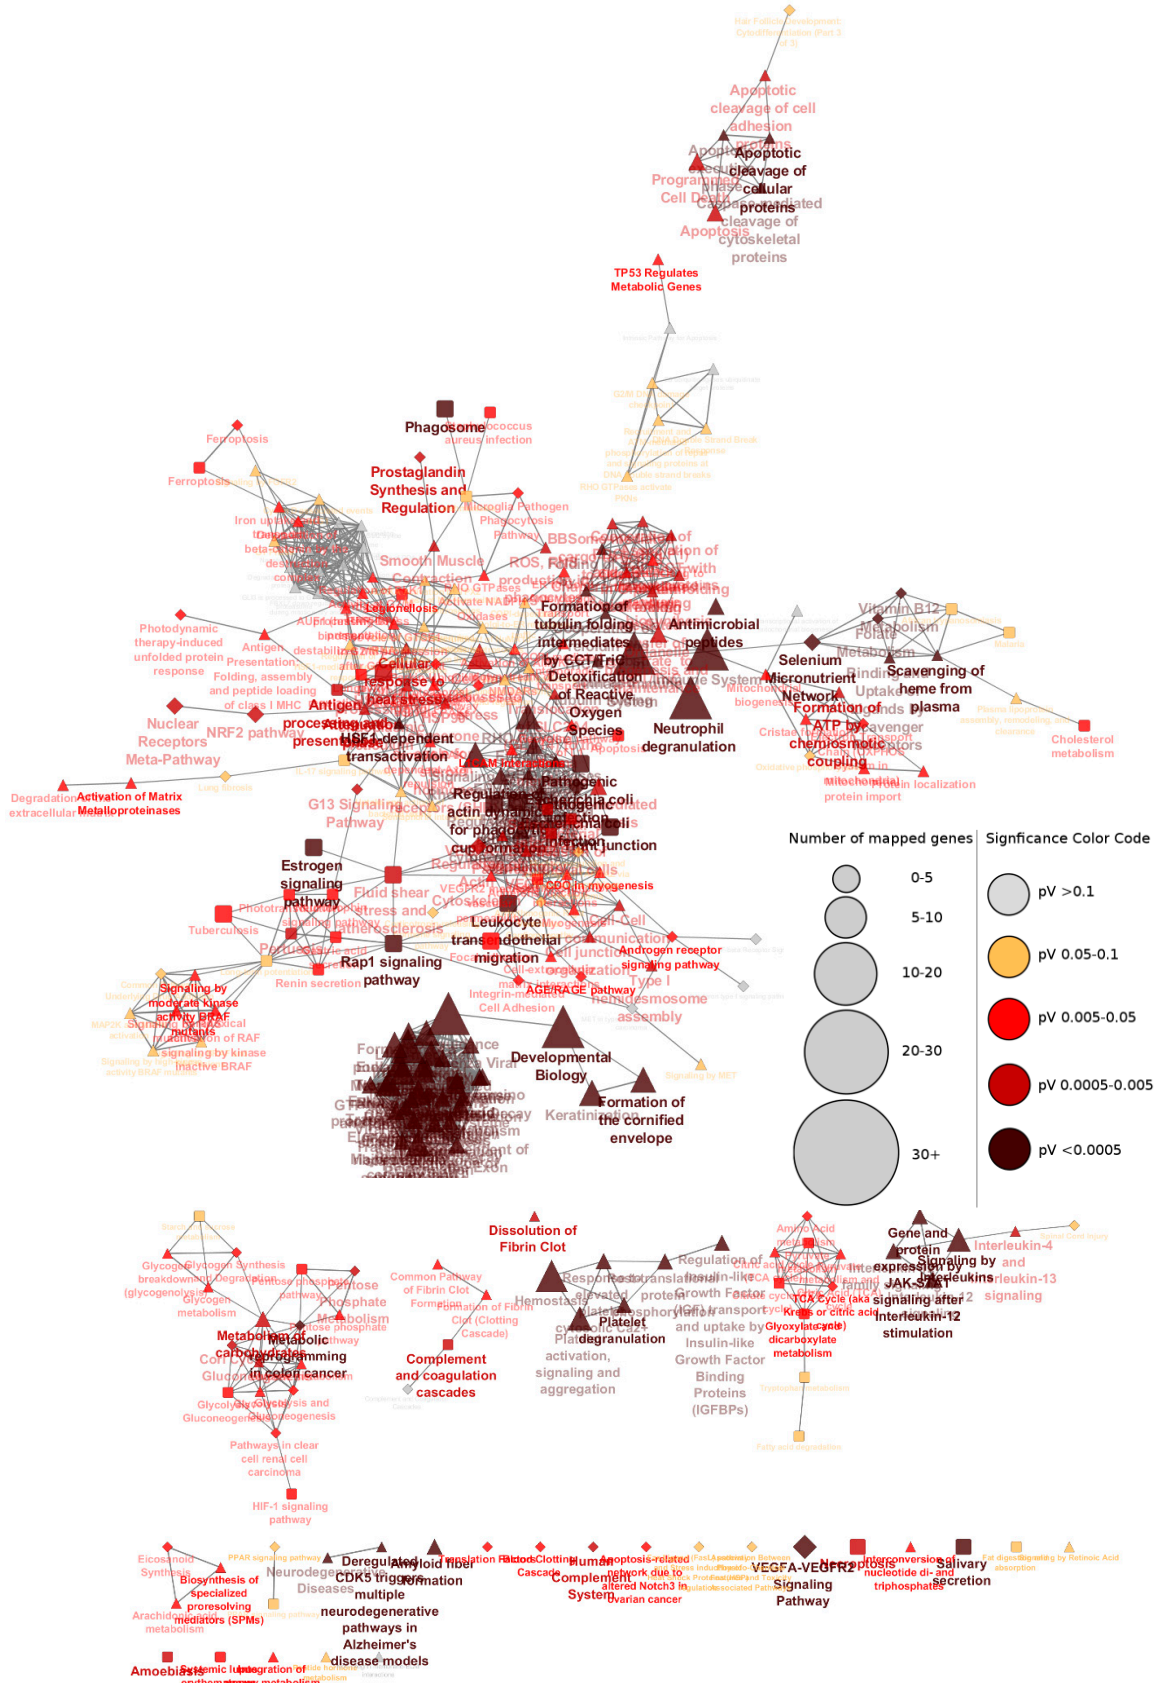

Figure S2: Combining KEGG (round rectangle), Reactome (triangle), and WikiPathways (diamond) through ClueGO (v2.5.4) App in Cytoscape (v3.7.0) revealed a strong and significant overrepresentation (FDR corrected p value < 0.05) of multiple pathways, including Apoptotic

cleavage of cellular proteins, Neutrophil degranulation, Tight junction, Infection, Developmental biology, Interleukin signaling, Platelet degranulation, Complement & coagulation cascades. Collectively the proteome indicates an underlying inflammatory state with strong links to the circulation and cell adhesion.

Table S1: Gene Ontology enrichment analysis of biological processes (STRING v11) showing the top 25 significantly overrepresented terms ( $p < 4.5 \times 10^{-16}$ ). The data show a significant enrichment of proteins involved in biological processes concerning the immune system response, epidermal cell differentiation, and endopeptidase activity.

| #term ID   | term description                                 | observed gene count | false discovery rate |
|------------|--------------------------------------------------|---------------------|----------------------|
| GO:0043299 | leukocyte degranulation                          | 83                  | 4.19E-53             |
| GO:0043312 | neutrophil degranulation                         | 82                  | 4.19E-53             |
| GO:0045055 | regulated exocytosis                             | 93                  | 4.19E-53             |
| GO:0002366 | leukocyte activation involved in immune response | 86                  | 1.06E-50             |
| GO:0002443 | leukocyte mediated immunity                      | 86                  | 5.35E-50             |
| GO:0002274 | myeloid leukocyte activation                     | 83                  | 5.95E-50             |
| GO:0002252 | immune effector process                          | 95                  | 4.93E-46             |
| GO:0032940 | secretion by cell                                | 94                  | 5.63E-44             |
| GO:0045321 | leukocyte activation                             | 91                  | 1.20E-43             |
| GO:0046903 | secretion                                        | 97                  | 6.85E-43             |
| GO:0016192 | vesicle-mediated transport                       | 116                 | 4.39E-41             |
| GO:0001775 | cell activation                                  | 93                  | 5.85E-41             |
| GO:0006955 | immune response                                  | 108                 | 3.09E-38             |
| GO:0006810 | transport                                        | 166                 | 4.07E-34             |
| GO:0002376 | immune system process                            | 122                 | 6.84E-32             |
| GO:0051179 | localization                                     | 176                 | 3.61E-27             |
| GO:0070268 | cornification                                    | 28                  | 3.96E-21             |
| GO:0050896 | response to stimulus                             | 205                 | 2.65E-19             |
| GO:0030216 | keratinocyte differentiation                     | 34                  | 1.34E-17             |
| GO:0030855 | epithelial cell differentiation                  | 49                  | 5.55E-17             |
| GO:0010951 | negative regulation of endopeptidase activity    | 32                  | 5.88E-17             |
| GO:0031424 | keratinization                                   | 31                  | 7.24E-17             |
| GO:0009913 | epidermal cell differentiation                   | 35                  | 7.37E-17             |

|                |                                      |    |          |
|----------------|--------------------------------------|----|----------|
| GO:005254<br>8 | regulation of endopeptidase activity | 38 | 3.64E-16 |
| GO:005254<br>7 | regulation of peptidase activity     | 39 | 4.42E-16 |
